# Supplementary material for: The study on the material basis and the mechanism for anti-renal interstitial fibrosis efficacy of rhubarb through integration of metabonomics and network pharmacology
Source: Royal Society of Chemistry journal article supplement (doi:10.1039/c4mb00573b), 2015-01-21
Supplement: c4mb00573b3.xlsx [file c4mb00573b3.xlsx]

## Sheet: Sheet1
GAD	OMIM	TTD & DrugBank
IL10	PEOA5	ACE
MPO	AT2R1	ADORA2A
RAGE	URG	ADRB2
MMP9	PKD2	AVPR1A
IL6	CA2	CA12
SELL	EYA1	CA4
ERCC6	GLUT9	CA9
IFNG	MOTA	CCR1
CHEK2	MCKD1	CTGF
VANGL1	REN	EPHX2
UMOD	BSND	HGF
CYP17A1	IFNG	HIF1A
CCR5	VIPAR	HIF1AN
IL4	VPP2	ITGA8
PPP1R15A	PAX2	KIT
CNDP1	PCLN1	MAOB
NOTCH1	RHDNS1	MAPK1
FCGR3B	ATP6B1	MAPK14
SHROOM3	COX10	MCP1
CCL5	URAT1	MMP12
VDR	RTADR	NCOA1
ERN1	SLC4A5	NFKB1
ATR	CNNM2	NFKBIA
GATM	SIX5	POLR2D
ACE	PKD1	POLR2G
HNF1A	RRM2B	PPARG
ITGB3	RET	RELA
SELE	SLC4A1	RXRA
NOS3	FGA	SERPINE1
TNF	UAQTL2	SYND2
DUSP13	DCP1	TGFB1
UGT2B7	PKDTS	TGFBR1
TPP1	VPP3	TGM2
CYB5R3	SERPINA8	TNFSF5
MAP4K5	UMOD	TYMP
CCNH	FSGS4	VTN
GLI1	RHPD	FN1
SPATA5L1	TCF2
GLO1	PKHD1
TNFRSF17	PTCPRN
RRM1	HDRS
	LYZ
	UPK3A
	VPS33B
	HOMG5
	TBS
	SLC5A2
	BOR
	HOMG2
	MVCD3
	MFH1
	SLC4A4
	FJHN
	NPH3
	SARS2
	SCARB2
