# Supplementary material for: The study on the material basis and the mechanism for anti-renal interstitial fibrosis efficacy of rhubarb through integration of metabonomics and network pharmacology
Source: Royal Society of Chemistry journal article supplement (doi:10.1039/c4mb00573b), 2015-01-21
Supplement: c4mb00573b4.xlsx [file c4mb00573b4.xlsx]

## Sheet: Sheet1
No	Name
1	(-)-epicatechin
2	(+)-catechin 3',4'-di-O-beta-D-glucopyranoside
3	(+)-catechin 3'-O-beta-D-glucopyranoside
4	(+)-catechin 5,3'-di-O-beta-D-glucopyranoside
5	(+)-catechin 5,4'-di-O-beta-D-glucopyranoside
6	(+)-catechin 7,3'-di-O-beta-D-glucopyranoside
7	(+)-catechin 8-C-beta-D-glucopyranoside
8	(2R-trans)-2-(3,4-dihydroxyphenyl)-3,4-dihydro-2H-1-benzopyran-3,5,7-triol
9	(2'S)-7-hydroxy-2-(2'-hydroxypropyl)-5-methylchromone
10	(2S,3R)-ent-catechin
11	(E)-1-(3,5-dihydroxyphenyl)-2-(4-hydroxyphenyl)-ethene
12	(E)-3-(beta-D-glucopyranosyloxy)-5-hydroxy-4'-methoxystilbene
13	(E)-3,3',5-trihydroxy-4'-methoxystilbene
14	(E)-3,5-dihydroxy-4'-methoxystlibene
15	1-(4-hydroxy-phenyl)-butan-3-one
16	1,2,6-tri-O-galloyl β-D-glucopyranoside
17	1,2-di-O-galloyl-6-cinnamoyl-β-D-glucose
18	1,2-di-O-galloyl-6-O-p-coumaroyl-β-D-glucose
19	1,2-di-O-galloyl-β-D-glucopyranose
20	1,3,8-trihydroxy-6-methyl-9,10-anthraquinone
21	1,3,8-trihydroxy-6-methylanthracene-9,10-dione
22	1,3-dihydroxy-anthraquinone-3-carboxylic acid methyl ester
23	1,6-di-O-galloyl-2-O-p-coumaroyl-beta-D-glucose
24	1,6-di-O-galloyl-beta-D-Glc
25	1,8-Dihydroxy-3-(hydroxymethyl)-9,10-anthracenedione
26	1,8-Dihydroxy-3-(hydroxymethyl)-anthraquinone
27	1,8-Dihydroxy-3-methoxy-6-methyl-9,10-anthracenedione
28	1,8-dihydroxy-3-methyl-9,10-anthraquinone
29	1,8-dihydroxyanthraquinone-3-carboxylic acid
30	1-O-beta-galloyl-glucose
31	1-O-galloyl-6-O-cinnamoyl-beta-D-glucose
32	1-O-Galloyl-beta-D-glucopyranose
33	1-O-Galloylglycerol
34	1'-O-galloylsucrose
35	2-(2'-hydroxypropyl)-5-methyl-7-hydroxychromone 7-O-beta-D-glucopyranoside
36	2-methyl-5-(2'-oxo-4'-hydroxypentyl)-7-hydroxychromone 7-O-beta-D-glucopyranoside
37	2-methyl-5-carboxymethyl-7-hydroxychromanone
38	2-methyl-5-carboxymethyl-7-hydroxychromone
39	2-O-Cinnamoyl-1-O-galloyl-beta-D-glucopyranose
40	2-O-galloylsucrose
41	3,3',5-trihydroxy-4'-methoxystilbene 3-O-beta-D-glucoside
42	3,4',5,7-tetrahydroxyflavone
43	3,4,5-trihydroxybenzenoic Acid
44	3,4,5-trihydroxybenzoic acid
45	3,4-dihydroxybenzoic acid
46	3,4-dihydroxy-benzoic acid
47	3,5,3',4'-Tetrahydroxystilbene
48	3,5,3',4'-tetrahydroxystilbene-3-O-beta-glucoside
49	3-hydroxy-5-[(1E)-2-(4-hydroxy-3-methoxyphenyl)ethenyl]phenyl beta-D-glucopyranoside
50	3-Methyl-6-methoxy-1,8-dihydroxy-anthrachinon-1-glucosid
51	3-O-galloyl-(-)-epicatechin
52	3-O-galloylepicatechin-(4beta-6)-3-O-galloylepicatechin-(4beta-6)-3-O-galloylepicatechin
53	3-O-galloylepicatechin-(4beta-6)-3-O-galloylepicatechin-(4beta-8)-3-O-galloylepicatechin
54	3-O-galloylepicatechin-(4beta-6)-3-O-galloylepicatechin-(4beta-8)-catechin
55	3-O-galloylepicatechin-(4beta-8)-3-O-galloylepicatechin-(4beta-6)-catechin
56	3-O-galloylepicatechin-(4beta-8)-3-O-galloylepicatechin-(4beta-8)-catechin
57	3-O-galloyl-epicatechin-(4beta-8)-catechin
58	3-phenyl-2E-propenoic acid
59	4-(4'-hydroxyphenyl)-2-butanone 4'-O-beta-D-(2,6-di-O-galloyl)glucopyranoside
60	4-(4'-hydroxyphenyl)-2-butanone 4'-O-beta-D-(2-O-galloyl)-glycopyranoside
61	4-(4'-hydroxyphenyl)-2-butanone 4'-O-beta-D-(2-O-galloyl-6-O-cinnamoyl)glucopyranoside
62	4-(4'-hydroxyphenyl)-2-butanone 4'-O-beta-D-(2-O-galloyl-6-O-p-coumaroyl)glucopyranoside
63	4-(4'-Hydroxyphenyl)butan-2-one 4'-O-beta-D-glucopyranoside
64	4,5,10-trihydroxy-anthracene-2-carboxylic acid methyl ester
65	4,5-dihydroxy-9,10-dioxoanthracene-2-carboxylic acid
66	4'-O-galloylsucrose
67	5-[(1Z)-2-(3-hydoxy-4-methoxyphenyl)ethenyl]benzene-1,3-diol
68	5-carboxymethyl-7-hydroxy-2-methylchromanone
69	6-mono-O-galloyl glucose
70	6'-O-galloylsucrose
71	6-O-galloylsucrose
72	7-Hydroxy-2,5-dimethyl-4-chromon
73	8-O-beta-D-glucosyl-10-C-beta-D-glucosyl rhein-9-anthrone
74	8-O-beta-D-gucosyl-10-hydroxy-10-beta-D-gycosyl rhein-9-anthrone
75	Aleo-emodin-8-O-beta-D-glucopyranoside
76	Aloesone 7-O-beta-D-glucopyranoside
77	Blumenol C-O-beta-D-glucopyranoside
78	Cassia chromone
79	Chrysophanol 1-O-beta-D-glucopyranoside
80	Chrysophanol-8-O-beta-D-glucopyranoside
81	Chrysophanol-Glc
82	Cis-3,3',5-trihydroxy-4'-methoxystilbene 3-O-beta-D-(2''-O-galloyl) glucopyranoside
83	Cis-3,3',5-trihydroxy-4'-methoxystilbene 3-O-beta-D-(6''-O-galloyl) glucopyranoside
84	Cis-3,3',5-trihydroxy-4'-methoxystilbene 3-O-beta-D-glucopyranoside
85	Cis-3,5-dihydroxy-4'-methoxystilbene 3-O-beta-D-glucopyranoside
86	Desoxyrhaponticin 6''-O-gallate
87	Dirhein
88	Epicatechin-3-O-gallate-(4beta-6)-epicatechin-3-O-gallate
89	Epicatechin-3-O-gallate-(4beta-8)-epicatechin-3-O-gallate-(4beta-8)-epicatechin-3-O-gallate
90	Gallic acid 3-O-beta-D-(6'-O-galloyl)-glucopyranoside
91	Gallic acid 3-O-beta-D-glucopyranoside
92	Gallic acid 4-O-beta-D-glucopyranoside
93	Isorhapontigenin
94	Lindleyin
95	Liquiritigenin 4'-O-beta-D-apiofuranosyl-(1-2)-beta-D-glucopyranoside
96	Meso-1,2-diphenylethylene
97	Physcionin
98	Piceatannol 3'-O-beta- D-glucopyranoside
99	Piceatannol 3-O-beta-D-(6''-O-galloyl) glucopyranoside
100	Piceatannol 3'-O-beta-D-xylopyranoside
101	Piceatannol 4'-O-(6''-O-galloyl)-beta-D-glucopyranoside
102	Piceatannol 4'-O-beta-D-glucopyranoside
103	Procyanidin B-1 6-C-beta-D-glucopyranoside
104	Procyanidin B-1 8-C-beta-D-glucopyranoside
105	Procyanidin B-2 6-C-beta-D-glucopyranoside
106	Procyanidin B-2 8-C-beta-D-glucopyranoside
107	Procyanidin B-3 7-O-beta-D-glucopyranoside
108	Procyanidin C-1 3',3''-di-O-gallate
109	Rhaponticin 2''-O-gallate
110	Rhaponticin 2''-O-gallate-2
111	Rhaponticin 2''-O-p-coumarate
112	Rhaponticin 6''-O-gallate
113	Rhapontigenin 3'-O-beta-D-glucopyranoside
