# Supplementary material for: The study on the material basis and the mechanism for anti-renal interstitial fibrosis efficacy of rhubarb through integration of metabonomics and network pharmacology
Source: Royal Society of Chemistry journal article supplement (doi:10.1039/c4mb00573b), 2015-01-21
Supplement: c4mb00573b5.xlsx [file c4mb00573b5.xlsx]

## Sheet: Sheet1
Targets Name	HGNC symbol	PDB-ID	Positive drugs	Vina Value	Anation
Angiotensin converting enzyme	ACE	1O86	Benazepril	-8.9
Adenosine A2α receptor	ADORA2A	3EML	Mefloquine	-9.8
β2 adrenergic receptor	ADRB2	3D4S	Carvedilol	-9.3
Vasopressin V1α receptor	AVPR1A	1YTV	Conivaptan	15.3
Carbonic anhydrase XII	CA12	1JD0	Hydroflumethiazide	-7.2
Carbonic anhydrase IV	CA4	1ZNC			NO ligand
Carbonic anhydrase IX	CA9	2HKF			NO ligand
C-C motif chemokine-2	MCP1	2BDN			NO ligand
C-C chemokine receptor type 1	CCR1	1Y5D	Maraviroc	-8.2
Connective tissue growth factor	CTGF				NO ligand
Soluble epoxide hydrolase	EPHX2	1ZD3	NC4	-7.4
Hepatocyte growth factor	HGF	1GMO	N,O6-Disulfo-Glucosamine	-5.3
Hypoxia-inducible factor 1α	HIF1A	1H2K	Everolimus	-6.3
Hypoxia-inducible factor 1-alpha inhibitor	HIF1AN	4JAA	N-oxalylglycine	-5.7
Integrin alpha-8	ITGA8	3T3P	N-acetyl-D-glucosamine	-4.6
Mast stem cell growth factor receptor	KIT	1T46	Sorafenib	-11.6
Monoamine oxidase B	MAOB	1OJ9	1,4-diphenyl-2-Butene	-9.3
Mitogen-activated protein kinase 1	MAPK1	1PME	Olomoucine	-7.1
Mitogen-activated protein kinase 14	MAPK14	1ZZ2	4-[5-[2-(1-Phenyl-Ethylamino)-Pyrimidin-4-Yl]-1-Methyl-4-(3-Trifluoromethylphenyl)-1h-Imidazol-2-Yl]-Piperidine_4-[5-[2-(1-Phenyl-Ethylamino)-Py	-10.9
Macrophage metalloelastase	MMP12	1UTT	2-(1,3-dioxoO-1,3-dihydro-2H-isoindol-2-yl) ethyl- 4-(4'-ethoxy [1,1'-biphenyl]-4-yl)-4-oxobutanoic acid	-10.6
Nuclear receptor coactivator 1	NCOA1	4JYI	3-chloro-4-[(E)-2-(5,5-dimethyl-8-phenyl- 5,6-dihydronaphthalen-2-yl)ethenyl]benzoic acid	-15.5
Nuclear factor NF-κB	NFKB1	1NFI			NO ligand
NF-kappa-B inhibitor alpha	NFKBIA	3BRT			NO ligand
DNA-directed RNA polymerase II 19 kDa polypeptide	POLR2D	2C35			NO ligand
DNA-directed RNA polymerase II subunit	POLR2G	2C35			NO ligand
Peroxisome proliferator-activated receptor	PPARG	1K74	Glipizide	-10.7
Transcription factor p65 peptide	RELA	3RC0	S-adenosylmethionine	-8.2
Retinoic acid receptor RXR-alpha	RXRA	4K4J	(2E,4E,6Z,8E)-8-(3,4-dihydronaphthalen-1(2H)- ylidene)-3,7-dimethylocta-2,4,6-trienoic acid	-11.4
Plasminogen activator inhibitor-1	SERPINE1	1OC0			NO ligand
Syndecan-2	SYND2				NO ligand
Transforming growth factor beta 1	TGFB1	1KLD			NO ligand
TGF-beta receptor type I	TGFBR1	3TZM	4-[5-(1,3-benzodioxol-5-yl)-4-(pyridin-2- yl)-1H-imidazol-2-yl]benzamide	-11.2
Protein-glutamine γ-glutamyltransferase	TGM2	2Q3Z			NO ligand
Tumor necrosis factor ligand superfamily member 5	TNFSF5	1I9R			NO ligand
Thymidine phosphorylase	TYMP	1UOU	Chloro-6-[(2-Iminopyrrolidin-1-Yl)Methyl]Pyrimidine-2,4(1h,3h)-Dione	-7.7
Vitronectin	VTN	3BT2			NO ligand
