# Supplementary material for: The study on the material basis and the mechanism for anti-renal interstitial fibrosis efficacy of rhubarb through integration of metabonomics and network pharmacology
Source: Royal Society of Chemistry journal article supplement (doi:10.1039/c4mb00573b), 2015-01-21
Supplement: c4mb00573b6.xlsx [file c4mb00573b6.xlsx]

## Sheet: Sheet1
No	Mass	Elemental composition	Identification results	HMDB	KEGG	UUO	RHG
1	125.999	C2H6O4S	2-Hydroxyethanesulfonate	HMDB03903	C05123	↑	↑+
2	142.038	C5H6N2O3	5-Hydroxymethyluracil	HMDB00469	C03088	↑	↑+
3	148.052	C9H8O2	Cinnamic acid	HMDB00567	C10438	↓	—
4	152.059	C7H8N2O2	Nudifloramide	HMDB04193	C05842	↑	↑+
5	160.1000	C10H12N2	Tryptamine	HMDB00303	C00398	↑	↑+
6	179.058	C9H9NO3	Hippuric acid	HMDB00714	C01586	↑	↑+
7	179.059	C9H9NO3	N-Acetylanthranilate	HMDB32388	C06332	↓	—
8	179.059	C9H9NO3	4-Oxo-4-(3-pyridyl)-butanoic acid	HMDB00992	C19569	↓	—
9	180.046	C6H12O4S	5-Methylthioribose	HMDB01087	C03089	↑	↑+
10	182.058	C9H10O4	Homovanillic acid sulfate	HMDB11719	C05582	↑	—
11	183.089	C9H13NO3	Epinephrine	HMDB00068	C00788	↑	—
12	189.043	C10H7NO3	Kynurenic acid	HMDB00715	C01717	↑	—
13	189.994	C6H6O5S	4-Sulfocatechol	HMDB29845	C11159	↓	↓
14	192.027	C6H8O7	Citric acid	HMDB00094	C00158	↓	—
15	192.028	C6H8O7	2,3-Diketo-L-gulonate	HMDB06511	C04575	↑	↑+
16	193.074	C10H11NO3	Phenylacetylglycine	HMDB00821	C05598	↑	↑
17	200.977	C3H7NO5S2	Cysteine-S-sulfate	HMDB00731	C05824	↑	↑+
18	205.037	C10H7NO4	Xanthurenic acid	HMDB00881	C02470	↓	↓+
19	278.127	C14H18N2O4	N1-(alpha-D-ribosyl)-5,6-dimethyl-benzimidazole	HMDB11112	C05775	↓	↓+
20	301.298	C18H39NO2	Sphinganine	HMDB00269	C00836	↑	—
21	317.293	C18H39NO3	Phytosphingosine	HMDB04610	C12144	↑	↑+
22	376.138	C17H20N4O6	Riboflavin	HMDB00244	C00255	↓	↓s
23	432.324	C27H44O4	3 beta,7 alpha-Dihydroxy-5-cholestenoate	HMDB12454	C17335	↑	↑+
When RHG is regarded as control group, a “↑” means a higher level of metabolites and “↓” represents a lower level of metabolites, whereas "—" represents no statistically significant difference. All data were represent intensities values of metabolites on day 21. When UUO is regarded as control group, “+” means a statistically significant difference (P < 0.05), whereas “s” represents no statistica…
